# Supplementary material
Source: publisher figshare collection journal article supplement (https://wiley.figshare.com/articles/dataset/_/3560151)
Supplement: Supplementary file 2 [file 1 › appendix-A.htm]

Ecological Archives E095-208-A1


*Ecological Archives* E095-208-A1

Thomas W. Dolan III, Mark J. Butler IV, Jeffrey D. Shields. 2014. Host behavior alters spiny lobster–viral disease dynamics: a simulation study. *Ecology* 95:2346–2361. http://dx.doi.org/10.1890/13-0118.1

Appendix A. Supplemental testing, sensitivity, and results for the *Panulirus* argus-PaV1 model.

> View / download PDF.

---

[Back to E095-208]
